# Supplementary material
Source: publisher figshare collection journal article supplement (https://gsajournals.figshare.com/ndownloader/files/22247601)
Supplement: Supplementary file 1 [file 22247601]

#Supplementary Table S2. Differentially expressed genes in Col at 1h low R/FR treatment.
	gene_id	logFC	logCPM	LR	PValue	FDR	description	name
1	AT3G15450	-1.403342656	5.337106586	87.14467366	1.01E-20	1.75E-16	Aluminium induced protein with YGL and LRDR motifs	NA
2	AT1G80920	-1.133037236	4.745002689	61.72351125	3.95E-15	3.42E-11	Chaperone DnaJ-domain superfamily protein	AtJ8;AtToc12;DJC22;J8;Toc12
3	AT5G20250	-1.484998798	4.874850457	60.84685926	6.17E-15	3.56E-11	Raffinose synthase family protein	DIN10;RS6
4	AT4G37610	-2.320933126	2.562847148	60.00711762	9.45E-15	3.87E-11	BTB and TAZ domain protein 5	BT5
5	AT2G15890	-0.946918648	6.049413635	59.67905965	1.12E-14	3.87E-11	maternal effect embryo arrest 14	CBP1;MEE14
6	AT2G07687	4.20357178	3.156474453	57.98278966	2.64E-14	7.64E-11	Cytochrome c oxidase, subunit III	NA
7	AT4G39800	0.892280081	6.234769712	51.61519923	6.75E-13	1.67E-09	myo-inositol-1-phosphate synthase 1	ATIPS1;ATMIPS1;MI-1-P SYNTHASE;MIPS1
8	AT3G25570	6.685637849	1.089375285	47.74351495	4.86E-12	1.05E-08	Adenosylmethionine decarboxylase family protein	SAMDC3
9	AT1G05090	-6.920799267	1.245070658	47.23007139	6.31E-12	1.14E-08	dentin sialophosphoprotein-related	NA
10	AT3G10020	-1.002443224	6.359096703	47.14701698	6.59E-12	1.14E-08	unknown protein; FUNCTIONS IN: molecular_function unknown; INVOLVED IN: response to oxidative stress, anaerobic respiration; LOCATED IN: cellular_component unknown; EXPRESSED IN: 23 plant structures; EXPRESSED DURING: 13 growth stages; Has 47 Blast hits to 47 proteins in 12 species: Archae - 0; Bacteria - 0; Metazoa - 1; Fungi - 0; Plants - 46; Viruses - 0; Other Eukaryotes - 0 (source: NCBI BLin…	NA
11	AT2G07741	7.345808437	1.558042777	46.09294952	1.13E-11	1.78E-08	ATPase, F0 complex, subunit A protein	NA
12	AT2G24945	-2.43050259	5.827203104	45.90068468	1.24E-11	1.80E-08	unknown protein; BEST Arabidopsis thaliana protein match is: unknown protein (TAIR:AT4G36925.1); Has 6 Blast hits to 6 proteins in 2 species: Archae - 0; Bacteria - 0; Metazoa - 0; Fungi - 0; Plants - 6; Viruses - 0; Other Eukaryotes - 0 (source: NCBI BLink).	NA
13	AT5G50580	-7.006504566	1.392059257	44.45074299	2.61E-11	3.48E-08	SUMO-activating enzyme 1B	AT-SAE1-2;SAE1B
14	AT5G49360	-0.795127166	4.924163509	36.90485258	1.24E-09	1.54E-06	beta-xylosidase 1	ATBXL1;BXL1
15	AT2G30600	-0.830115824	6.581798962	36.48312388	1.54E-09	1.78E-06	BTB/POZ domain-containing protein	NA
16	AT5G12050	1.203146281	4.813492118	34.90195623	3.47E-09	3.76E-06	unknown protein; BEST Arabidopsis thaliana protein match is: unknown protein (TAIR:AT3G13980.1); Has 1807 Blast hits to 1807 proteins in 277 species: Archae - 0; Bacteria - 0; Metazoa - 736; Fungi - 347; Plants - 385; Viruses - 0; Other Eukaryotes - 339 (source: NCBI BLink).	BG1
17	AT1G75380	-0.836301782	6.021754807	33.84029229	5.98E-09	6.10E-06	bifunctional nuclease in basal defense response 1	ATBBD1;BBD1
18	AT1G22400	-0.663872752	6.984322332	31.83975642	1.67E-08	1.54E-05	UDP-Glycosyltransferase superfamily protein	ATUGT85A1;UGT85A1
19	AT3G30775	-1.458433549	3.238783529	31.82661286	1.69E-08	1.54E-05	Methylenetetrahydrofolate reductase family protein	AT-POX;ATPDH;ATPOX;ERD5;PDH1;PRO1;PRODH
20	AT5G61590	-0.887646764	4.60159113	29.43530601	5.78E-08	5.01E-05	Integrase-type DNA-binding superfamily protein	DEWAX;ERF107
21	AT1G78270	-1.380582954	4.031814152	28.81518928	7.96E-08	6.57E-05	UDP-glucosyl transferase 85A4	AtUGT85A4;UGT85A4
22	AT2G37040	0.682820389	5.864239497	28.66779062	8.59E-08	6.77E-05	PHE ammonia lyase 1	ATPAL1;PAL1
23	AT2G25900	-0.772126346	7.083860567	27.88192649	1.29E-07	9.71E-05	Zinc finger C-x8-C-x5-C-x3-H type family protein	ATCTH;ATTZF1
24	AT5G56100	-0.824108732	4.851460969	27.4884664	1.58E-07	0.000114101	glycine-rich protein / oleosin	NA
25	AT4G10960	6.496786656	1.045772364	26.17439787	3.12E-07	0.000216206	UDP-D-glucose/UDP-D-galactose 4-epimerase 5	UGE5
26	AT2G15960	-0.764880828	6.15143026	26.08920922	3.26E-07	0.000217267	unknown protein; Has 14 Blast hits to 14 proteins in 5 species: Archae - 0; Bacteria - 0; Metazoa - 0; Fungi - 0; Plants - 14; Viruses - 0; Other Eukaryotes - 0 (source: NCBI BLink).	NA
27	AT4G32280	2.787388468	1.422360189	25.98203935	3.45E-07	0.000221162	indole-3-acetic acid inducible 29	IAA29
28	AT2G15880	-0.910751274	5.359004314	25.55327044	4.30E-07	0.000266317	Leucine-rich repeat (LRR) family protein	LRX10
29	AT1G35280	6.28762152	0.774570029	25.05572341	5.57E-07	0.0003328	transposable element gene	NA
30	AT1G56220	-0.704293042	7.237455626	24.92285731	5.97E-07	0.000344658	Dormancy/auxin associated family protein	NA
31	AT1G23390	-1.042530752	6.817399518	24.41497738	7.77E-07	0.000434109	Kelch repeat-containing F-box family protein	KFB
32	AT5G39860	1.356998359	2.876390807	24.05326319	9.37E-07	0.000507425	basic helix-loop-helix (bHLH) DNA-binding family protein	BHLH136;BNQ1;PRE1
33	AT1G01240	-0.82294251	4.323892409	23.46434632	1.27E-06	0.000668179	unknown protein; INVOLVED IN: N-terminal protein myristoylation; EXPRESSED IN: 17 plant structures; EXPRESSED DURING: 11 growth stages; BEST Arabidopsis thaliana protein match is: unknown protein (TAIR:AT2G46550.1); Has 95 Blast hits to 78 proteins in 16 species: Archae - 0; Bacteria - 2; Metazoa - 11; Fungi - 0; Plants - 80; Viruses - 0; Other Eukaryotes - 2 (source: NCBI BLink).	NA
34	AT3G44310	0.591307426	7.860730063	23.25418972	1.42E-06	0.000723398	nitrilase 1	ATNIT1;NIT1;NITI
35	AT3G25572	-5.589888416	0.288224971	23.07985439	1.55E-06	0.000769415	conserved peptide upstream open reading frame 11	NA
36	AT1G27290	-0.851266844	4.578224693	23.02251895	1.60E-06	0.000770686	unknown protein; Has 44 Blast hits to 44 proteins in 12 species: Archae - 0; Bacteria - 0; Metazoa - 0; Fungi - 0; Plants - 44; Viruses - 0; Other Eukaryotes - 0 (source: NCBI BLink).	NA
37	AT5G66580	0.883024903	4.024759824	22.93472524	1.68E-06	0.000784896	unknown protein; FUNCTIONS IN: molecular_function unknown; INVOLVED IN: N-terminal protein myristoylation; LOCATED IN: cellular_component unknown; BEST Arabidopsis thaliana protein match is: unknown protein (TAIR:AT3G50800.1); Has 1807 Blast hits to 1807 proteins in 277 species: Archae - 0; Bacteria - 0; Metazoa - 736; Fungi - 347; Plants - 385; Viruses - 0; Other Eukaryotes - 339 (source: NCBI B…	NA
38	AT5G64570	-0.606586832	7.129854104	22.68946434	1.90E-06	0.000868265	beta-D-xylosidase 4	ATBXL4;XYL4
39	AT1G04280	-0.993900798	4.042191646	21.94701649	2.80E-06	0.001245316	P-loop containing nucleoside triphosphate hydrolases superfamily protein	NA
40	AT1G53885	-5.760663633	0.435174783	21.1609019	4.22E-06	0.00182937	Protein of unknown function (DUF581)	NA
41	AT5G05860	-0.701318808	4.466051228	20.99958267	4.59E-06	0.001941511	UDP-glucosyl transferase 76C2	UGT76C2
42	AT2G41430	-0.522397924	7.651228241	20.58773519	5.70E-06	0.002350001	dehydration-induced protein (ERD15)	CID1;ERD15;LSR1
43	AT1G80180	-0.720101346	4.654791917	20.02422461	7.65E-06	0.003067498	unknown protein; FUNCTIONS IN: molecular_function unknown; INVOLVED IN: biological_process unknown; LOCATED IN: plasma membrane; EXPRESSED IN: 21 plant structures; EXPRESSED DURING: 10 growth stages; BEST Arabidopsis thaliana protein match is: unknown protein (TAIR:AT1G15400.3); Has 30201 Blast hits to 17322 proteins in 780 species: Archae - 12; Bacteria - 1396; Metazoa - 17338; Fungi - 3422; Pla…	NA
44	AT5G48490	-0.735219104	4.961300866	19.98894438	7.79E-06	0.003067498	Bifunctional inhibitor/lipid-transfer protein/seed storage 2S albumin superfamily protein	DIR1-like
45	AT1G26800	-0.805988231	3.934316762	19.7533173	8.81E-06	0.00339277	RING/U-box superfamily protein	MPSR1
46	AT5G61440	-0.92046564	3.76313694	19.58825694	9.61E-06	0.003618455	atypical CYS HIS rich thioredoxin 5	ACHT5
47	AT3G15540	0.782440752	4.29466159	19.51567879	9.98E-06	0.0036786	indole-3-acetic acid inducible 19	IAA19;MSG2
48	AT5G44050	1.037457782	3.030673017	19.428045	1.04E-05	0.00377107	MATE efflux family protein	AtDTX28
49	AT5G03380	-0.496954356	6.254790195	19.24956751	1.15E-05	0.004056038	Heavy metal transport/detoxification superfamily protein	NA
50	AT1G57990	-0.654161601	4.52375807	19.20349905	1.17E-05	0.004072005	purine permease 18	ATPUP18;PUP18
51	AT5G21940	-0.908599622	4.299561848	18.92879683	1.36E-05	0.004610231	unknown protein; BEST Arabidopsis thaliana protein match is: unknown protein (TAIR:AT3G43850.1); Has 30201 Blast hits to 17322 proteins in 780 species: Archae - 12; Bacteria - 1396; Metazoa - 17338; Fungi - 3422; Plants - 5037; Viruses - 0; Other Eukaryotes - 2996 (source: NCBI BLink).	NA
52	AT2G33830	-1.121406268	3.474878272	18.7427611	1.50E-05	0.004984803	Dormancy/auxin associated family protein	AtDRM2;DRM2
53	AT3G59940	-0.503499102	6.761261658	18.4632928	1.73E-05	0.00560381	Galactose oxidase/kelch repeat superfamily protein	AtKFB50;KFB50;KMD4
54	AT2G26710	1.327826637	2.255748924	18.44767267	1.75E-05	0.00560381	Cytochrome P450 superfamily protein	BAS1;CYP72B1;CYP734A1
55	AT2G05540	-1.722367763	2.165053717	18.30336557	1.88E-05	0.005837559	Glycine-rich protein family	NA
56	AT1G32900	0.70021871	4.903950376	18.30051549	1.89E-05	0.005837559	UDP-Glycosyltransferase superfamily protein	GBSS1
57	AT1G73600	0.653067715	6.77770717	17.95481007	2.26E-05	0.006813209	S-adenosyl-L-methionine-dependent methyltransferases superfamily protein	AtPMT3;NMT;NMT3
58	AT4G25835	-0.551193664	5.045329885	17.93093571	2.29E-05	0.006813209	P-loop containing nucleoside triphosphate hydrolases superfamily protein	NA
59	AT1G64720	-0.520519117	10.36918355	17.90686713	2.32E-05	0.006813209	Polyketide cyclase/dehydrase and lipid transport superfamily protein	CP5
60	AT1G67900	0.577940335	6.02867655	17.83978751	2.40E-05	0.006940023	Phototropic-responsive NPH3 family protein	NA
61	AT3G07310	-0.461797011	6.679224072	17.73697667	2.54E-05	0.007205265	Protein of unknown function (DUF760)	NA
62	AT1G75190	-0.516250859	7.9559027	17.69698951	2.59E-05	0.007239645	unknown protein; Has 7306 Blast hits to 3858 proteins in 279 species: Archae - 15; Bacteria - 134; Metazoa - 3314; Fungi - 546; Plants - 228; Viruses - 207; Other Eukaryotes - 2862 (source: NCBI BLink).	NA
63	AT1G76560	-0.788414313	3.977231466	17.57936926	2.76E-05	0.007416499	CP12 domain-containing protein 3	CP12-3
64	AT1G68190	-0.610684932	5.487299057	17.56862711	2.77E-05	0.007416499	B-box zinc finger family protein	BBX27
65	AT5G40450	-0.519709771	7.620590288	17.56122034	2.78E-05	0.007416499	unknown protein; FUNCTIONS IN: molecular_function unknown; INVOLVED IN: biological_process unknown; LOCATED IN: chloroplast, plasma membrane; EXPRESSED IN: 24 plant structures; EXPRESSED DURING: 13 growth stages; Has 30201 Blast hits to 17322 proteins in 780 species: Archae - 12; Bacteria - 1396; Metazoa - 17338; Fungi - 3422; Plants - 5037; Viruses - 0; Other Eukaryotes - 2996 (source: NCBI BLin…	RBB1
66	AT1G28330	-0.98523785	4.1417074	17.45102461	2.95E-05	0.00773998	dormancy-associated protein-like 1	AtDRM1;DRM1;DYL1
67	AT5G18030	1.300828138	2.242598346	17.39861838	3.03E-05	0.007837588	SAUR-like auxin-responsive protein family	SAUR21
68	AT3G22840	1.119393126	3.138199118	17.17573751	3.41E-05	0.008683389	Chlorophyll A-B binding family protein	ELIP;ELIP1
69	AT1G77210	-1.065959082	2.662152855	16.63068359	4.54E-05	0.011403936	sugar transporter 14	AtSTP14;STP14
70	AT4G17870	-0.649876927	4.379661311	16.5282029	4.79E-05	0.011865175	Polyketide cyclase/dehydrase and lipid transport superfamily protein	PYR1;RCAR11
71	AT1G32640	0.527545314	5.362500479	16.23924455	5.58E-05	0.013461581	Basic helix-loop-helix (bHLH) DNA-binding family protein	ATMYC2;JAI1;JIN1;MYC2;RD22BP1;ZBF1
72	AT2G40004	1.963114099	2.016941344	16.23288987	5.60E-05	0.013461581	unknown protein; LOCATED IN: endomembrane system; Has 30201 Blast hits to 17322 proteins in 780 species: Archae - 12; Bacteria - 1396; Metazoa - 17338; Fungi - 3422; Plants - 5037; Viruses - 0; Other Eukaryotes - 2996 (source: NCBI BLink).	NA
73	AT3G22370	0.755372374	3.752106906	16.2094198	5.67E-05	0.013461581	alternative oxidase 1A	AOX1A;ATAOX1A;AtHSR3;HSR3
74	AT5G24490	-0.55005625	9.193712824	16.13916442	5.89E-05	0.013773587	30S ribosomal protein, putative	NA
75	AT4G31500	0.563014875	5.27787925	16.11482298	5.96E-05	0.013773587	cytochrome P450, family 83, subfamily B, polypeptide 1	ATR4;CYP83B1;RED1;RNT1;SUR2
76	AT2G43760	-0.460944473	6.71736543	16.08906031	6.04E-05	0.013778525	molybdopterin biosynthesis MoaE family protein	CNX6
77	AT3G17070	1.256589671	2.173355664	16.06258566	6.13E-05	0.01379105	Peroxidase family protein	NA
78	AT2G18700	-0.544831645	5.039716298	15.91236057	6.63E-05	0.014581094	trehalose phosphatase/synthase 11	ATTPS11;ATTPSB;TPS11
79	AT1G11260	-0.429100925	7.237050221	15.90858228	6.65E-05	0.014581094	sugar transporter 1	ATSTP1;STP1
80	AT4G27520	0.421200445	7.95666962	15.83480038	6.91E-05	0.014971285	early nodulin-like protein 2	AtENODL2;ENODL2
81	AT2G38010	0.760064373	3.870973737	15.79168429	7.07E-05	0.015102591	Neutral/alkaline non-lysosomal ceramidase	AtNCER2
82	AT2G36880	0.429931982	7.189320737	15.77155805	7.15E-05	0.015102591	methionine adenosyltransferase 3	MAT3
83	AT1G61800	1.707722509	2.185688284	15.67889726	7.51E-05	0.01566972	glucose-6-phosphate/phosphate translocator 2	ATGPT2;GPT2
84	AT1G80300	0.437176814	6.23844135	15.57161277	7.94E-05	0.016386993	nucleotide transporter 1	ATNTT1;NTT1
85	AT2G17350	-0.501768655	5.265483786	15.53707757	8.09E-05	0.016492742	unknown protein; Has 119 Blast hits to 93 proteins in 40 species: Archae - 0; Bacteria - 3; Metazoa - 18; Fungi - 12; Plants - 44; Viruses - 0; Other Eukaryotes - 42 (source: NCBI BLink).	NA
86	AT3G61260	-0.445091947	7.656545454	15.4746114	8.36E-05	0.016848645	Remorin family protein	NA
87	ATCG00810	-0.680624356	7.410345135	15.36756887	8.85E-05	0.017426663	ribosomal protein L22	RPL22
88	AT5G51910	-0.91324265	2.994948192	15.36742256	8.85E-05	0.017426663	TCP family transcription factor	TCP19
89	AT5G36670	-5.502230007	0.482554198	15.27120675	9.31E-05	0.018131177	RING/FYVE/PHD zinc finger superfamily protein	NA
90	AT4G15930	-0.594358403	4.941302391	15.23506274	9.49E-05	0.018276139	Dynein light chain type 1 family protein	NA
91	AT1G65060	0.773009056	4.435346676	15.0817777	0.000102952	0.019603933	4-coumarate:CoA ligase 3	4CL3
92	AT2G43820	-0.85478328	3.895017004	15.0405771	0.000105224	0.019818765	UDP-glucosyltransferase 74F2	ATSAGT1;GT;SAGT1;SGT1;UGT74F2
93	AT3G07780	-0.415332264	7.391749205	14.84956698	0.000116435	0.021694432	Protein of unknown function (DUF1423)	OBE1
94	AT2G22510	-0.635173207	4.413589191	14.75917426	0.000122152	0.022517501	hydroxyproline-rich glycoprotein family protein	NA
95	AT1G09415	-0.477408856	5.7779476	14.64365869	0.000129871	0.023688444	NIM1-interacting 3	NIMIN-3
96	AT5G59750	-0.673787596	4.283538794	14.60227493	0.000132754	0.023821585	DHBP synthase RibB-like alpha/beta domain;GTP cyclohydrolase II	AtRIBA3;RIBA3
97	AT3G14810	0.725636882	3.849316813	14.5767228	0.000134567	0.023821585	mechanosensitive channel of small conductance-like 5	MSL5
98	AT5G46240	0.746315856	4.600138808	14.57450529	0.000134725	0.023821585	potassium channel in Arabidopsis thaliana 1	AtKAT1;KAT1
99	AT5G52900	0.68202013	3.782154022	14.43308727	0.000145228	0.025240171	unknown protein; Has 30201 Blast hits to 17322 proteins in 780 species: Archae - 12; Bacteria - 1396; Metazoa - 17338; Fungi - 3422; Plants - 5037; Viruses - 0; Other Eukaryotes - 2996 (source: NCBI BLink).	MAKR6
100	AT1G21130	-0.618733161	5.261995584	14.42509176	0.000145846	0.025240171	O-methyltransferase family protein	IGMT4
101	AT3G15770	-1.11329353	2.452411302	14.40874151	0.000147118	0.025240171	unknown protein; BEST Arabidopsis thaliana protein match is: unknown protein (TAIR:AT5G25360.2); Has 143 Blast hits to 143 proteins in 25 species: Archae - 0; Bacteria - 0; Metazoa - 0; Fungi - 0; Plants - 136; Viruses - 0; Other Eukaryotes - 7 (source: NCBI BLink).	NA
102	AT5G47370	0.882289294	4.073334296	14.34258593	0.000152379	0.025653091	Homeobox-leucine zipper protein 4 (HB-4) / HD-ZIP protein	HAT2
103	AT2G36420	-0.46944482	6.347449238	14.34126553	0.000152485	0.025653091	unknown protein; BEST Arabidopsis thaliana protein match is: unknown protein (TAIR:AT5G03670.1); Has 10588 Blast hits to 6606 proteins in 440 species: Archae - 8; Bacteria - 365; Metazoa - 4146; Fungi - 1198; Plants - 483; Viruses - 212; Other Eukaryotes - 4176 (source: NCBI BLink).	TRM27
104	ATCG00540	-1.123634631	5.60648936	14.27033621	0.000158341	0.026381991	photosynthetic electron transfer A	PETA
105	AT1G69570	2.498651362	0.728882977	14.23072807	0.000161708	0.026686488	Dof-type zinc finger DNA-binding family protein	CDF5
106	AT1G71030	-0.614419671	4.977013769	14.17580211	0.000166498	0.027217712	MYB-like 2	ATMYBL2;MYBL2
107	AT1G62480	-0.435377923	8.415201507	14.10916011	0.000172502	0.027935601	Vacuolar calcium-binding protein-related	NA
108	AT2G44180	-0.547747392	5.357418045	13.91010644	0.000191765	0.030721318	methionine aminopeptidase 2A	MAP2A
109	AT4G34881	-0.533043566	5.164908691	13.8956103	0.000193249	0.030721318	unknown protein; FUNCTIONS IN: molecular_function unknown; INVOLVED IN: biological_process unknown; LOCATED IN: endomembrane system; Has 30201 Blast hits to 17322 proteins in 780 species: Archae - 12; Bacteria - 1396; Metazoa - 17338; Fungi - 3422; Plants - 5037; Viruses - 0; Other Eukaryotes - 2996 (source: NCBI BLink).	NA
110	AT3G06080	-0.491042055	4.918723747	13.81627479	0.000201583	0.031754743	Plant protein of unknown function (DUF828)	TBL10
111	AT1G37130	0.511210923	6.921088277	13.72935773	0.000211128	0.032958848	nitrate reductase 2	ATNR2;B29;CHL3;NIA2;NIA2-1;NR;NR2
112	AT2G33810	-0.682026898	3.919470989	13.69629509	0.000214878	0.033244692	squamosa promoter binding protein-like 3	SPL3
113	AT1G15740	-0.638200945	4.405732428	13.53721869	0.000233879	0.035864165	Leucine-rich repeat family protein	NA
114	AT1G30820	-0.460235673	5.659066949	13.47598958	0.000241636	0.036612293	CTP synthase family protein	NA
115	AT2G42530	0.391313841	7.064242783	13.4373528	0.000246663	0.036612293	cold regulated 15b	COR15B
116	AT3G57520	-0.483135817	4.994388068	13.41708444	0.000249343	0.036612293	seed imbibition 2	AtSIP2;RS2;SIP2
117	AT5G07530	2.064200672	1.837414355	13.40989792	0.0002503	0.036612293	glycine rich protein 17	ATGRP-7;ATGRP17;GRP17
118	AT3G56705	3.076990682	0.939699949	13.3944525	0.00025237	0.036612293	U2.6; snRNA	U2.6
119	AT3G30695	2.050246578	1.505387378	13.39082494	0.000252858	0.036612293	transposable element gene	NA
120	AT3G15720	-1.075216183	2.482148489	13.38571681	0.000253548	0.036612293	Pectin lyase-like superfamily protein	NA
121	AT3G46600	-0.69874647	3.973206393	13.2909274	0.000266694	0.038176433	GRAS family transcription factor	NA
122	AT2G46790	0.525437644	4.807089398	13.27627474	0.000268786	0.038176433	pseudo-response regulator 9	APRR9;PRR9;TL1
123	AT2G43020	1.183756327	4.048300483	13.21832999	0.000277225	0.039054849	polyamine oxidase 2	ATPAO2;PAO2
124	AT1G06149	1.573573373	3.440025687	13.0721917	0.000299712	0.041174179	conserved peptide upstream open reading frame 8	NA
125	AT3G49160	-1.079110577	3.100233919	13.04872411	0.000303491	0.041174179	pyruvate kinase family protein	NA
126	AT1G24879	-4.982398656	-0.013446976	13.04536428	0.000304036	0.041174179	pseudogene of UDP-3-O-acyl N-acetylglucosamine deacetylase family protein/F-box protein related	NA
127	AT2G45170	-0.966595613	2.642631785	13.01713753	0.000308653	0.041174179	AUTOPHAGY 8E	ATATG8E;ATG8E
128	AT1G72820	-0.484040733	5.168000127	12.99649458	0.000312075	0.041174179	Mitochondrial substrate carrier family protein	NA
129	AT2G45850	-0.484656899	6.014062543	12.99587472	0.000312178	0.041174179	AT hook motif DNA-binding family protein	AHL9
130	AT5G04760	-0.614927049	4.038279008	12.9901552	0.000313133	0.041174179	Duplicated homeodomain-like superfamily protein	NA
131	AT1G06000	0.460263371	6.123392026	12.97586267	0.000315532	0.041174179	UDP-Glycosyltransferase superfamily protein	UGT89C1
132	AT5G49480	0.508544978	5.203918731	12.97048277	0.00031644	0.041174179	Ca2+-binding protein 1	ATCP1;CP1
133	AT3G01520	-0.739136008	3.385443008	12.96641381	0.000317129	0.041174179	Adenine nucleotide alpha hydrolases-like superfamily protein	NA
134	AT5G19140	-0.396690337	6.664435943	12.95888919	0.000318406	0.041174179	Aluminium induced protein with YGL and LRDR motifs	AILP1;ATAILP1
135	AT3G45140	0.587341048	7.020776266	12.93192958	0.000323025	0.041462007	lipoxygenase 2	ATLOX2;LOX2
136	AT5G38040	-0.755859712	3.197914801	12.85575077	0.000336444	0.042866885	UDP-Glycosyltransferase superfamily protein	NA
137	AT4G16780	1.166786709	2.281682727	12.78881394	0.000348698	0.04410395	homeobox protein 2	ATHB-2;ATHB2;HAT4;HB-2
138	AT1G69760	-0.63809254	5.380968836	12.75530616	0.000355001	0.044357695	unknown protein; BEST Arabidopsis thaliana protein match is: unknown protein (TAIR:AT1G26920.1); Has 51 Blast hits to 51 proteins in 15 species: Archae - 0; Bacteria - 2; Metazoa - 2; Fungi - 7; Plants - 29; Viruses - 0; Other Eukaryotes - 11 (source: NCBI BLink).	NA
139	AT4G21990	0.889192913	5.065008701	12.75097265	0.000355824	0.044357695	APS reductase 3	APR3;ATAPR3;PRH-26;PRH26
140	AT2G42040	-0.573721853	4.857771832	12.72944967	0.000359942	0.044550591	CONTAINS InterPro DOMAIN/s: WRC (InterPro:IPR014977); Has 219 Blast hits to 219 proteins in 19 species: Archae - 0; Bacteria - 0; Metazoa - 3; Fungi - 0; Plants - 215; Viruses - 0; Other Eukaryotes - 1 (source: NCBI BLink).	NA
141	AT5G04890	-0.518961157	4.600972635	12.67576338	0.000370426	0.045522985	HSP20-like chaperones superfamily protein	RTM2
142	AT3G02470	-0.68999709	5.942983632	12.64512378	0.000376547	0.045949284	S-adenosylmethionine decarboxylase	SAMDC
143	AT4G17770	0.583344405	4.104499496	12.60361727	0.000385001	0.046074424	trehalose phosphatase/synthase 5	ATTPS5;TPS5
144	AT1G70290	-0.544693327	6.353057229	12.5939175	0.000387004	0.046074424	trehalose-6-phosphatase synthase S8	ATTPS8;ATTPSC;TPS8
145	AT1G79700	-0.938514946	2.770150841	12.58243093	0.00038939	0.046074424	Integrase-type DNA-binding superfamily protein	WRI4
146	AT5G24580	-0.467160412	4.920188516	12.57301414	0.000391357	0.046074424	Heavy metal transport/detoxification superfamily protein	NA
147	AT5G22920	-0.819774128	4.482862654	12.57255729	0.000391453	0.046074424	CHY-type/CTCHY-type/RING-type Zinc finger protein	AtRZPF34;CHYR1;RZPF34
148	AT4G21534	1.263602107	1.978896363	12.56268571	0.000393526	0.046074424	Diacylglycerol kinase family protein	SPHK2
149	AT3G26430	0.976430944	4.748304557	12.54608585	0.000397037	0.046173547	GDSL-like Lipase/Acylhydrolase superfamily protein	NA
150	AT1G80440	-1.557700569	1.627176304	12.39817065	0.000429755	0.049645258	Galactose oxidase/kelch repeat superfamily protein	KFB20;KMD1
151	AT2G42540	0.485243384	5.616437361	12.38259174	0.000433355	0.049729663	cold-regulated 15a	AtCOR15A;COR15;COR15A
